# Supplementary material for: KIF20A- A New Discovery in Tumor Therapy
Source: Research Square preprint supplement (doi:10.21203/rs.3.rs-7044011/v1), 2025-07-17
Supplement: Supplementary file 1 [file 5d77eaab81584ab9e9bf4016.docx]

**Supplementary Materials**

Supplementary Figure 1 KIF20A expression assessed using TCGA and TCGA + GTEx.
